# Supplementary material
Source: publisher figshare collection journal article supplement (https://tandf.figshare.com/ndownloader/files/14162801)
Supplement: Supplementary file 1 [file 14162801]

# Search strategy of Embase

| **OR** | **AND** | | |
| --- | --- | --- | --- |
| **Population** | **Intervention** | **Study design *** |
| Thorax surgery [exp] [tiab] (p)  Thoracotomy [exp] [tiab] (p)  Thoracic surgery [tiab] (p)  Video-assisted thoracic surgery [tiab] (p)  Video-assisted thorascopic surgery [tiab] (p)  Lung surgery [tiab] (p)  Lung resection [tiab] (p)  Lung resectional surgery [tiab] (p)  Lung volume reduction surgery [tiab] (p)  Lung lobectomy [tiab] (p)  Lobectomy [tiab] (p) | Chest physical therapy [tiab]  Chest physiotherapy [tiab]  Respiratory physiotherapy [tiab]  Respiratory physical therapy [tiab]  Lung physiotherapy [tiab]  Lung physical therapy [tiab]  CPAP device [exp] [tiab] (p)  Continuous positive airway pressure [tiab]  CPAP [tiab]  Bilevel positive airway pressure [tiab]  Biphasic positive airway pressure [tiab]  Intermittent positive pressure breathing [tiab]  Noninvasive ventilation [exp] [tiab]  Inspiratory muscle training [tiab]  Positive expiratory pressure [tiab]  Airway clearance technique [tiab] (p)  Breathing exercises [exp] [tiab] (p)  Incentive spirometry [tiab]  Sustained maximal inspiration [tiab]  Postural drainage [exp] [tiab]  Autogenic drainage [tiab]  Bronchial drainage [tiab]  Bronchial hygiene [tiab]  ELTGOL [tiab]  Forced expiratory technique [tiab] (p)  Early ambulation [tiab]  Early mobilization [tiab] | Randomized controlled trial [exp] [tiab] [pt]  RCT [tiab] [pt]  Controlled clinical trial [tiab] [pt]  Randomized [tiab]  Randomised [tiab]  Placebo [tiab]  Randomly [tiab]  Trial [tiab]  Groups [tiab]  Control group [tiab] |
| AND, OR denotes boolean operators  [exp] denotes Emtree term (exploded)  [tiab] denotes search in title and abstract  [pt] denotes search in publication type  (p) denotes search in both single and plural  * Inspired by *Cochrane Highly Sensitive Search Strategy for identifying randomised trials for MEDLINE* (reference) | | |
